# Supplementary material
Source: MDPI journal article supplement (https://www.mdpi.com/2073-4395/13/8/2127)
Supplement: s1 [file s1]

Supplementary information

# GGE-Biplot based transcriptional analysis of 7 genes involved in steroidal glycoalkaloid biosynthesis in potato (*Solanum tuberosum* L.)

Feng Zhao<sup>1,2,†</sup>, Yajie Li<sup>1,3,\*</sup>, Tongxia Cui<sup>3,4</sup>, Jiangping Bai<sup>3</sup>

<sup>1</sup> Dingxi Institute of Agriculture Research, Dingxi, Gansu Province 743000, China;

<sup>2</sup> Institute of Economic Crop and Beer Material, Gansu Academy of Agricultural Science, Lanzhou, Gansu Province, 730070, China;

<sup>3</sup> Gansu Key Lab of Crop Improvement & Germplasm Enhancement/Gansu Provincial Key Lab of Aridland Crop Science, College of Agronomy, Gansu Agricultural University, Lanzhou, Gansu Province 730070, China;

<sup>4</sup> Gansu Agriculture Technology college, Lanzhou, Gansu Province 730010, China;

\* Correspondence: [liyajie\\_2008@163.com](mailto:liyajie_2008@163.com)

† These authors contributed equally to this work.

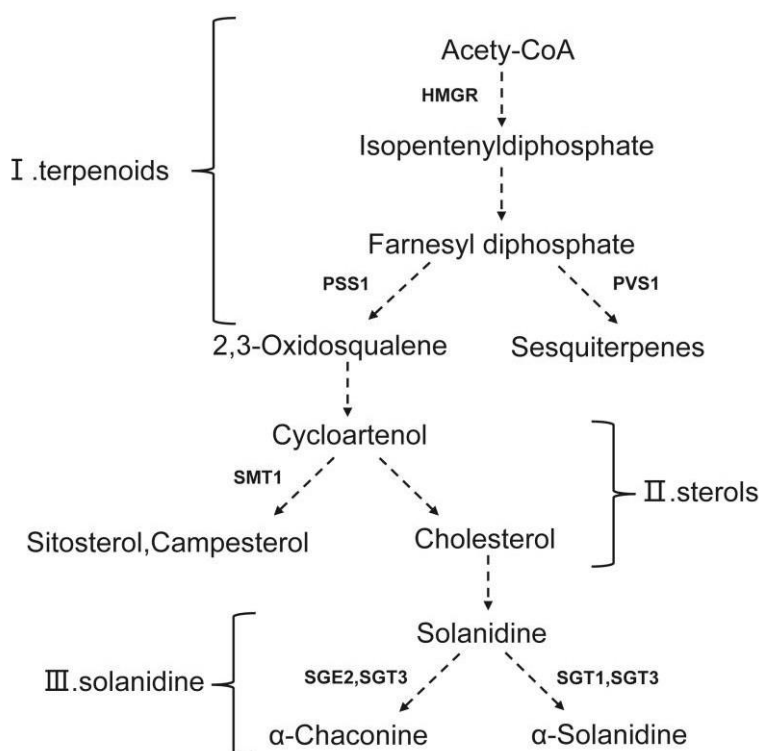

**Figure S1.** Simplified biosynthetic pathway for steroidal glycoalkaloids. The biosynthetic pathway is presented from acetyl-CoA to steroidal glycoalkaloids with additional pathways included that use the same substrate. Dashed arrows indicate multiple enzymatic steps. HMGR (3-hydroxy-3-methylglutaryl coenzyme A reductase 1&2), PSS1 (Squalene synthase), PVS1 (Vetispiradiene sesquiterpene cyclase), SGT1 (Solanidine galactosyltransferase), SGT2 (Solanidine glucosyltransferase) and SGT3 (Rhamnosyltransferase).

Table S1. Primer information for qRT-PCR

| ID       | Primer                   |
|----------|--------------------------|
| hmg1-F   | CTTCTCGTAAGGTGGCGTGA     |
| hmg1-R   | AACCCAATCCCAAAGAAACC     |
| hmg2-F   | TGGTGCCCTTGGTGGTTTC      |
| hmg2-R   | TTGCCATCATTTACAGCCTCC    |
| pss1-F   | TCTCTCGTAGTTTTGCTCTCGTC  |
| pss1-R   | CCTCAACAGTGTCAAGTGCTCG   |
| pvs1-F   | GTGAAGTATCAAGGTGGTGGAAAG |
| pvs1-R   | AGGTTCAGCATACACCCCCATC   |
| sgt1-F   | AAGCCACAATCCTCACTACCC    |
| sgt1-R   | AGGCAACCCAACTTCAGCAG     |
| sgt2-F   | TACCCACCACAATGCTTCC      |
| sgt2-R   | ATCCCTTCAGGCAACCCA       |
| sgt3-F   | AGAGGAGTAAAAGGGTGGCAT    |
| sgt3-R   | AGCAAACAAAGAGAACGGAGT    |
| actinI-F | AGGAGCATCCTGTCCTCCTAA    |
| actinI-R | CACCATCACCAGAGTCCAACA    |
